# Supplementary material for: A Genetic Basis for Mechanosensory Traits in Humans
Source: PubMed Central journal article supplement (PMC3341339; doi:10.1371/journal.pbio.1001318), 2012-05-01
Supplement: pbio.1001318.s009.pdf [file pbio.1001318.s009.pdf]

**Table S2: Gender comparison of sensory traits**

| Trait                                     | Female                | Male                 | Two tailed t-test       |
|-------------------------------------------|-----------------------|----------------------|-------------------------|
| Vibration detection threshold [JND]       | 7.22 ± 0.10; n = 170  | 7.59 ± 0.26; n = 103 | p > 0.05; <sup>ns</sup> |
| Tactile acuity [mm]                       | 1.54 ± 0.03; n = 189  | 1.68 ± 0.04; n = 140 | p < 0.01; **            |
| Hearing acuity [dB]                       | 8.32 ± 0.35; n = 94   | 9.29 ± 0.44; n = 60  | p > 0.05; <sup>ns</sup> |
| EOAE reproducibility [%]                  | 86.83 ± 0.86; n = 123 | 82.46 ± 1.14; n = 71 | p < 0.01; **            |
| EOAE strength [dB]                        | 17.9 ± 0.34; n = 122  | 15.36 ± 0.49; n = 71 | p < 0.001; ***          |
| Baroreflex sequence slope [ms / mmHg]     | 24.21 ± 1.30; n = 113 | 23.82 ± 1.76; n = 60 | p > 0.05; <sup>ns</sup> |
| Baroreflex sequence frequency [1 / 5 min] | 27.51 ± 1.36; n = 113 | 21.72 ± 1.33; n = 60 | p < 0.01; **            |
| Cold detection threshold [°C]             | -0.66 ± 0.04; n = 103 | -0.8 ± 0.06; n = 69  | p < 0.05; *             |
| Warmth detection threshold [°C]           | 1.22 ± 0.06; n = 99   | 1.61 ± 0.10; n = 70  | p < 0.01; **            |
| Heat pain threshold [°C]                  | 44.79 ± 0.20; n = 99  | 45.23 ± 0.26; n = 70 | p > 0.05; <sup>ns</sup> |
| Cold pain threshold [°C]                  | 13.77 ± 1.00; n = 108 | 12.7 ± 1.20; n = 68  | p > 0.05; <sup>ns</sup> |

Listed are the values ± SEM. <sup>ns</sup> - not significant; \* - p < 0.05; \*\* - p < 0.005; \*\*\* - p < 0.001; t-test.
