# Supplementary material for: A Genetic Basis for Mechanosensory Traits in Humans
Source: PubMed Central journal article supplement (PMC3341339; doi:10.1371/journal.pbio.1001318), 2012-05-01
Supplement: pbio.1001318.s010.pdf [file pbio.1001318.s010.pdf]

**Table S3: Summary of Cross-twin correlations and heritability estimates of sensory traits**

| <b>Trait</b>                                     | <b>r MZ</b> | <b>r DZ</b> | <b><math>h^2</math></b> | <b>95% CI</b> | <b>Model</b> |
|--------------------------------------------------|-------------|-------------|-------------------------|---------------|--------------|
| <b>Vibration detection threshold [JND]</b>       | 0.53        | 0.19        | 0.52                    | 0.33 - 0.67   | AE           |
| <b>Tactile acuity [mm]</b>                       | 0.28        | 0.10        | 0.27                    | 0.05 - 0.46   | AE           |
| <b>Hearing acuity [dB]</b>                       | 0.74        | 0.35        | 0.8                     | 0.67 - 0.87   | AE           |
| <b>EOAE reproducibility [%]</b>                  | 0.79        | 0.18        | 0.76                    | 0.62 - 0.85   | AE           |
| <b>EOAE strength [dB]</b>                        | 0.89        | 0.36        | 0.88                    | 0.80 - 0.93   | AE           |
| <b>Baroreflex sequence slope [ms / mmHg]</b>     | 0.39        | 0.26        | 0.39                    | 0.17 - 0.57   | AE           |
| <b>Baroreflex sequence frequency [1 / 5 min]</b> | 0.57        | 0.00        | 0.56                    | 0.34 - 0.71   | AE           |
| <b>Cold detection threshold [°C]</b>             | 0.41        | -0.02       | 0.4                     | 0.16 - 0.60   | AE           |
| <b>Warmth detection threshold [°C]</b>           | 0.44        | 0.11        | 0.37                    | 0.14 - 0.56   | AE           |
| <b>Heat pain threshold [°C]</b>                  | 0.25        | 0.31        | -                       | -             | CE           |
| <b>Cold pain threshold [°C]</b>                  | 0.45        | 0.39        | -                       | -             | CE           |

$r_{MZ}$ ,  $r_{DZ}$  = intraclass correlation of monozygotic and dizygotic twin pairs;  $h^2$  = heritability estimate; 95% CI = 95% confidence interval; model = best fitting model; AE = model with genetic and unique environment component; CE = model with common environment and unique environment component.
