# Supplementary material for: A Genetic Basis for Mechanosensory Traits in Humans
Source: PubMed Central journal article supplement (PMC3341339; doi:10.1371/journal.pbio.1001318), 2012-05-01
Supplement: pbio.1001318.s011.pdf [file pbio.1001318.s011.pdf]

**Table S4: Individual mutations in the *USH2A* gene of the people tested for touch sensitivity and the corresponding tactile acuity thresholds.**

| <b>n</b> | <b>Mutation 1</b>  |              | <b>Mutation 2</b> |              | <b>tactile acuity [mm]</b>                       |
|----------|--------------------|--------------|-------------------|--------------|--------------------------------------------------|
| <b>1</b> | c.2299delG         | p.E767SfsX21 | c.4381C>T         | p.Q1461X     | 1.34                                             |
| <b>1</b> | c.2299delG         | p.E767SfsX21 | c.11864G>A        | p.W3955X     | 3.23                                             |
| <b>5</b> | c.2299delG         | p.E767SfsX21 | c.2299delG        | p.E767SfsX21 | 1.50, 1.80, 1.99, 1.33<br>1.72                   |
| <b>1</b> | c.1724G>A          | p.C575Y      | c.11864G>A        | p.W3955X     | 1.65                                             |
| <b>1</b> | c.2135delC         | p.S712X      | c.2431_2432delAA  | p.K811DfsX11 | 3.66                                             |
| <b>1</b> | c.2431_2432delAA   | p.K811DfsX11 | c.2431_2432delAA  | p.K811DfsX11 | 2.06                                             |
| <b>1</b> | c.1214delA         | p.N405IfsX3  | c.4029T>A or G    | p.N1343K     | 1.74                                             |
| <b>2</b> | c.2299delG         | p.E767SfsX21 | c.11234dupA       | p.Y3745X     | 1.81, 1.83                                       |
| <b>1</b> | c.2299delG         | p.E767SfsX21 | c.1256G>T         | p.C419F      | 1.81                                             |
| <b>1</b> | c.653T>A           | p.V218E      | 5777+1G>A         | splice site  | 1.37                                             |
| <b>1</b> | c.4515_4518delAGAG | p.R1505SfsX7 | c.13316C>T        | p.4439I      | 1.53                                             |
| <b>2</b> | c.11864G>A         | p.W3955X     | c.1036A>C         | p.N346H      | 1.56, 2.37                                       |
| <b>1</b> | c.9424G>T          | p.G3142X     | c.2299delG        | p.E767SfsX21 | 1.34                                             |
| <b>8</b> | c.2299delG         | p.E767SfsX21 | unknown           | unknown      | 2.83, 2.37, 1.64, 2.19<br>1.27, 1.37, 1.90, 1.26 |
| <b>1</b> | c.653T>A           | p.V218E      | unknown           | unknown      | 1.11                                             |
| <b>1</b> | c.1606T>C          | p.C536R      | unknown           | unknown      | 1.53                                             |
| <b>1</b> | c.13316C>T         | p.T4439I     | unknown           | unknown      | 1.36                                             |
| <b>5</b> | c.11864G>A         | p.W3955X     | unknown           | unknown      | 1.22, 0.80, 1.67, 1.55,<br>2.19                  |
| <b>1</b> | c.486-14G>A        | splice site  | unknown           | unknown      | 1.33                                             |
