# Supplementary material for: A Genetic Basis for Mechanosensory Traits in Humans
Source: PLoS Biol. 2012 May 1;10(5):e1001318. doi: 10.1371/journal.pbio.1001318 (PMC3341339; doi:10.1371/journal.pbio.1001318)
Supplement: Table S1 — Trait–age correlations and regressions used for age correction. (PDF) [file pbio.1001318.s008.pdf]

**Table S1: Trait – age correlations and regressions used for age correction.**

| <b>Trait</b>                                     | <b>Correlation to age (r)</b> | <b>Type of fit for age correction*</b> | <b>Coefficient of determination (R<sup>2</sup>)</b> | <b>Equation</b>                                  |
|--------------------------------------------------|-------------------------------|----------------------------------------|-----------------------------------------------------|--------------------------------------------------|
| <b>Vibration detection threshold [JND]</b>       | 0.46, p < 0.001               | Polynomial 2 <sup>nd</sup> order       | 0.22                                                | $y = 6.19 + 0.00137 \cdot x^2$                   |
| <b>Tactile acuity [mm]</b>                       | 0.42, p < 0.001               | Polynomial 2 <sup>nd</sup> order       | 0.21                                                | $y = 1.41 + 0.00025 \cdot x^2$                   |
| <b>Hearing acuity [dB]</b>                       | 0.42, p < 0.001               | Polynomial 2 <sup>nd</sup> order       | 0.18                                                | $y = 6.89 + 0.00201 \cdot x^2$                   |
| <b>EOAE reproducibility [%]</b>                  | 0.15, p < 0.05                | Linear                                 | 0.02                                                | $y = 89.10 - 0.15205 \cdot x$                    |
| <b>EOAE strength [dB]</b>                        | 0.20, p < 0.01                | Linear                                 | 0.04                                                | $y = 19.10 - 0.08390 \cdot x$                    |
| <b>Baroreflex sequence slope [ms / mmHg]</b>     | -0.38, p < 0.001              | Exponential decay                      | 0.16                                                | $y = 51.68 \cdot \exp(-0.03231 \cdot x) + 3.246$ |
| <b>Baroreflex sequence frequency [1 / 5 min]</b> | 0.01, n.s.                    | Linear                                 | 0.02                                                | $y = 25.62 + 0.01067 \cdot x$                    |
| <b>Cold detection threshold [°C]</b>             | -0.41, p < 0.001              | Polynomial 2 <sup>nd</sup> order       | 0.22                                                | $y = 31.51 - 0.00022 \cdot x^2$                  |
| <b>Warmth detection threshold [°C]</b>           | 0.29, p < 0.001               | Polynomial 2 <sup>nd</sup> order       | 0.08                                                | $y = 33.10 + 0.00024 \cdot x^2$                  |
| <b>Heat pain threshold [°C]</b>                  | 0.18, p < 0.05                | Linear                                 | 0.03                                                | $y = 43.80 + 0.03531 \cdot x$                    |
| <b>Cold pain threshold [°C]</b>                  | -0.15, p < 0.05               | Polynomial 2 <sup>nd</sup> order       | 0.02                                                | $y = 15.37 - 0.00184 \cdot x^2$                  |

n.s. – not significant ; \*chosen from a set of equations (linear, polynomial 2<sup>nd</sup> order, exponential, exponential association, exponential decay) according to Akaike's Information Criterion (AIC); y – trait parameter; x – age.
