# Supplementary material for: A Genetic Basis for Mechanosensory Traits in Humans
Source: PLoS Biol. 2012 May 1;10(5):e1001318. doi: 10.1371/journal.pbio.1001318 (PMC3341339; doi:10.1371/journal.pbio.1001318)
Supplement: Table S5 — Conversion table for just noticeable difference to peak-to-peak amplitude in µm. (PDF) [file pbio.1001318.s012.pdf]

**Table S5: Conversion table from JND to  $\mu\text{m}$  for the CASEIV vibration detection threshold test**

| JND  | $\mu\text{m}$ |
|------|---------------|
| 1    | 0.106         |
| 1.5  | 0.133         |
| 2    | 0.166         |
| 2.5  | 0.205         |
| 3    | 0.251         |
| 3.5  | 0.305         |
| 4    | 0.370         |
| 4.5  | 0.448         |
| 5    | 0.539         |
| 5.5  | 0.649         |
| 6    | 0.778         |
| 6.5  | 0.932         |
| 7    | 1.114         |
| 7.5  | 1.332         |
| 8    | 1.590         |
| 8.5  | 1.897         |
| 9    | 2.263         |
| 9.5  | 2.696         |
| 10   | 3.212         |
| 10.5 | 3.824         |
| 11   | 4.553         |
| 11.5 | 5.418         |
| 12   | 6.447         |
| 12.5 | 7.669         |
| 13   | 9.122         |
| 13.5 | 10.849        |
| 14   | 12.901        |
| 14.5 | 15.340        |
| 15   | 18.239        |
| 15.5 | 21.684        |
| 16   | 25.778        |
| 16.5 | 30.644        |
| 17   | 36.428        |
| 17.5 | 43.301        |
| 18   | 51.471        |
| 18.5 | 61.180        |
| 19   | 72.718        |
| 19.5 | 86.431        |
| 20   | 102.730       |
